# Supplementary material for: Fluoroacetate biosynthesis from the marine-derived bacterium Streptomyces xinghaiensis NRRL B-24674
Source: Royal Society of Chemistry journal article supplement (doi:10.1039/c4ob00970c), 2014-01-01
Supplement: c4ob00970c1.pdf [file c4ob00970c1.pdf]

# Fluoroacetate from the marine-derived bacterium *Streptomyces xinghaiensis* NRRL B-24674

S. Huang<sup>a#</sup> L. Ma<sup>b#</sup> Ming Him Tong<sup>c</sup> Y. Yu<sup>a\*</sup> H. Deng<sup>a,c\*</sup> D. O'Hagan<sup>b\*</sup>

<sup>a</sup> Key Laboratory of Combinatory Biosynthesis and Drug Discovery (Ministry of Education), School of Pharmaceutical Sciences, Wuhan University, 185 East Lake Road, Wuhan 430071 (P. R. China). Email: [yuyi119@hotmail.com](mailto:yuyi119@hotmail.com)

<sup>b</sup> School of Chemistry and Biomedical Sciences Research Centre, University of St Andrews, North Haugh, St Andrews KY169ST, United Kingdom. Email: [do1@st-and.ac.uk](mailto:do1@st-and.ac.uk)

<sup>c</sup> Marine Biodiscovery Centre, Department of Chemistry, Meston Walk, University of Aberdeen, Aberdeen AB24 3UE, United Kingdom. Email: [h.deng@abdn.ac.uk](mailto:h.deng@abdn.ac.uk)

## Materials and Methods

### Medium and strains used in this study

*E. coli* DH10B and *E. coli* ET12567 (pUZ8002) were cultured in L Broth or L agar at 37 °C. *Streptomyces xinghaiensis* NRRL B-24674 was cultured on ISP4 which contains 18% (w/v) sea salt for spores formation, and cultured in liquid TSBY (which contains yeast extract 5g/L and tryptone soya broth 30g/L) for mycelium growth. DNA isolation and *Streptomyces* genetic manipulation were performed according to standard methods. <sup>1</sup>

### In-frame deletion of *flk4*

To inactivate *flk4*, a 2325 bp upstream fragment and a 2169 bp downstream fragment were amplified from genomic DNA of *Streptomyces xinghaiensis* NRRL B-24674 by high fidelity PCR using the primers Flk-F1/Flk-R1 and Flk-R2/Flk-F2, respectively (Table S1). PCR was performed in 20 µL of volume with 5% DMSO and KOD DNA polymerase (TOYOBO). The amplification conditions were: initial denaturation at 95 °C for 5 min; 30 cycles of denaturation at 95 °C for 30 s, annealing at 55 °C for 30 s, and extension at 68 °C for 2.5 min; and gap infilling at 68 °C for 10 min. The obtained fragments were digested with XbaI/EcoRV and EcoRV/HindIII respectively, and cloned into the XbaI/HindIII site of pKC1139 to give the in-frame deletion construct pWDY40, which was then transferred into *Streptomyces xinghaiensis* NRRL B-24674 via *E. coli-Streptomyces* conjugation. Following the procedure described previously <sup>2</sup>, the *flk4* in-frame deletion mutant strains were screened out through PCR using primers Flk-id-F/Flk-id-R (955 bp for wild type strain, and 604 bp for mutant strain) and designated as WDY40.

To complement  $\Delta flk4$ , a 441 bp fragment which contains the whole *flk4* gene was amplified from genomic DNA of *Streptomyces xinghaiensis* NRRL B-24674 by high fidelity PCR using the primers Flk-HB-F/Flk-HB-R (Table S1). The amplication conditions were: initial denaturation at 95 °C for 5 min; 30 cycles of denaturation at 95 °C for 30 s, annealing at 55 °C for 30 s, and extension at 68 °C for 1 min; and gap infilling at 68 °C for 10 min. The obtained fragment was cloned into the NdeI site of pIB139 by using In-fusion<sup>®</sup> HD Cloning Kit (Clontech) to give the complementation

construct pWDY41, which was then transferred into the *ΔflK4* mutant via *E. coli-Streptomyces* conjugation. Following the procedure described previously [2], the *ΔflK4* complementation mutant strains were screened out through PCR and designated as WDY41.

| Primer   | Sequence <sup>a</sup>                     | Function               |
|----------|-------------------------------------------|------------------------|
| Flk-F1   | TTTAAGCTTCCTCCCGGGCCAATATCTAC             | flK4 in-frame deletion |
| Flk-R1   | AAAGATATCTGGAGAAGAAGATCGGCCGT             | flK4 in-frame deletion |
| Flk-F2   | TTTGATATCGAGTGAACCTTCTCTCCGGT             | flK4 in-frame deletion |
| Flk-R2   | AAATCTAGACAACCTCACCATCAACAATG             | flK4 in-frame deletion |
| Flk-id-F | GGGTGTCCATCTCCGAGACGAA                    | WDY40 verification     |
| Flk-id-R | TCGCACTCCAGCACATGGCA                      | WDY40 verification     |
| Flk-HB-F | AGGATCCCCAACATATGTCAGCTCTCCCCGGTCTCC<br>A | ΔflK4 complementation  |
| Flk-HB-R | GGTAGGATCCACATATGCGGGAAGGCCTGCTCAC        | ΔflK4 complementation  |

<sup>a</sup> Restriction sites for HindIII (AAGCTT), EcoRV (GATATC), XbaI (TCTAGA), and NdeI (CATATG) are underlined.

**Table S1** Primer used in this study.

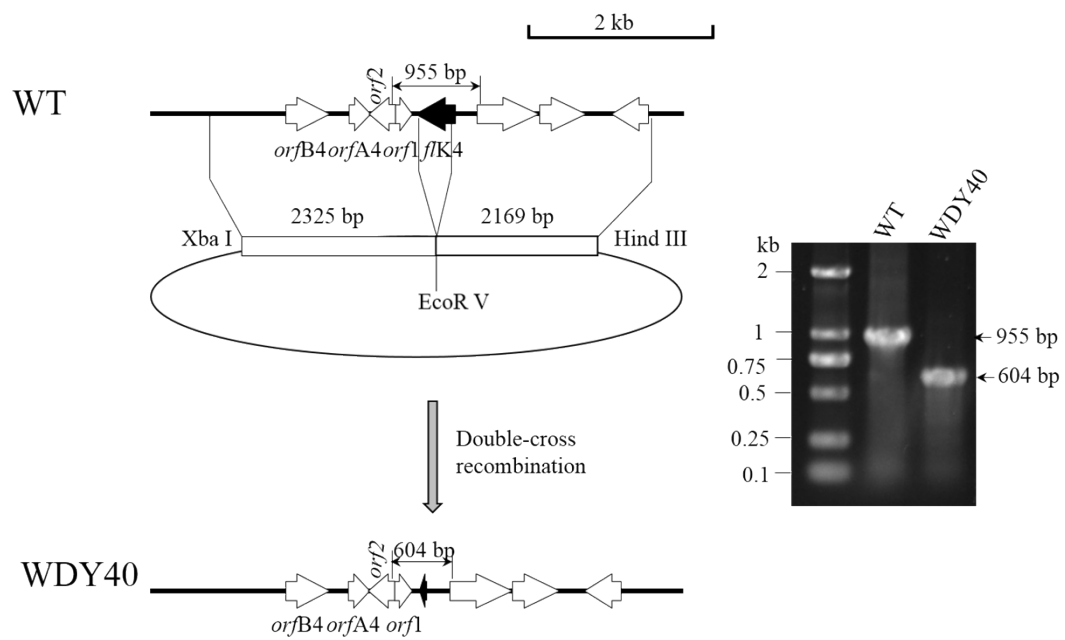

**Figure S1.** Scheme showing the in-frame deletion of *fIK4* and success of construction was confirmed by PCR amplification. For the wild-type gene, the PCR product is 955 bp, while for the mutant the PCR product is 604 bp.

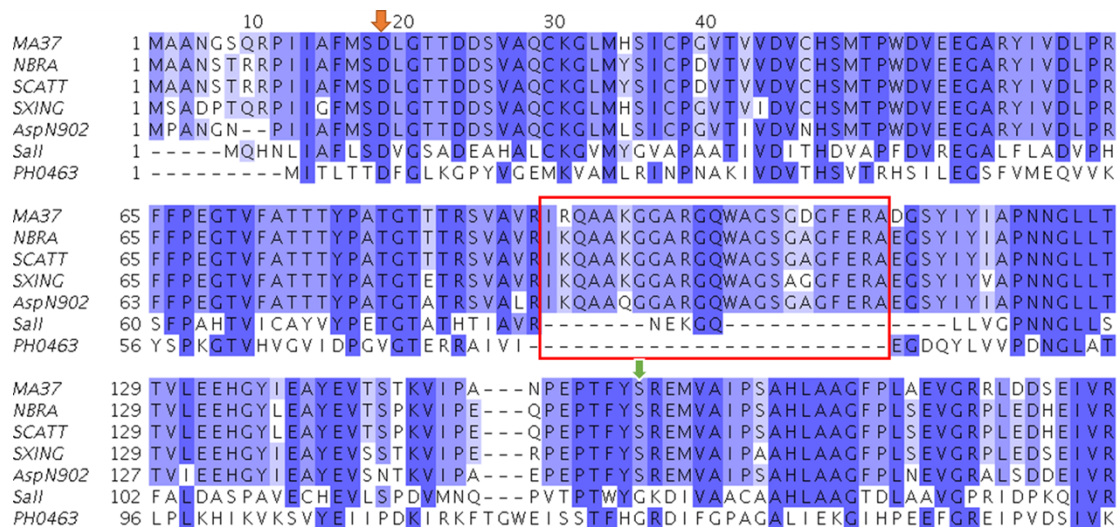

Figure S2 Amino acid alignment among the fluorinases and other related protein generated by Jalview. [REF] The red and green stars indicated that the key residues in the active sites of the fluorinases are highly conserved. SXING is the fluorinase from *Streptomyces xinghaiensis* NRRL B24674; MA37 is the fluorinase from *Streptomyces sp.* MA37; [Ref] NBRA is the fluorinase (YP\_006809254) from *Nocardia brasiliensis* HUJEG-1 (ATCC 700358); SCATT is the fluorinase from *Streptomyces cattleya*; AspN902 is the putative fluorinase (YP\_007949809) from the rare actinomycete *Actinoplanes sp.* N902-109; SalI is the chlorinase from the marine actinomycete *Salinospora tropica*<sup>3</sup>; PH0463 is the SAM hydroxide adenosyltransferase from *Pyrococcus horikoshii*<sup>4</sup>.

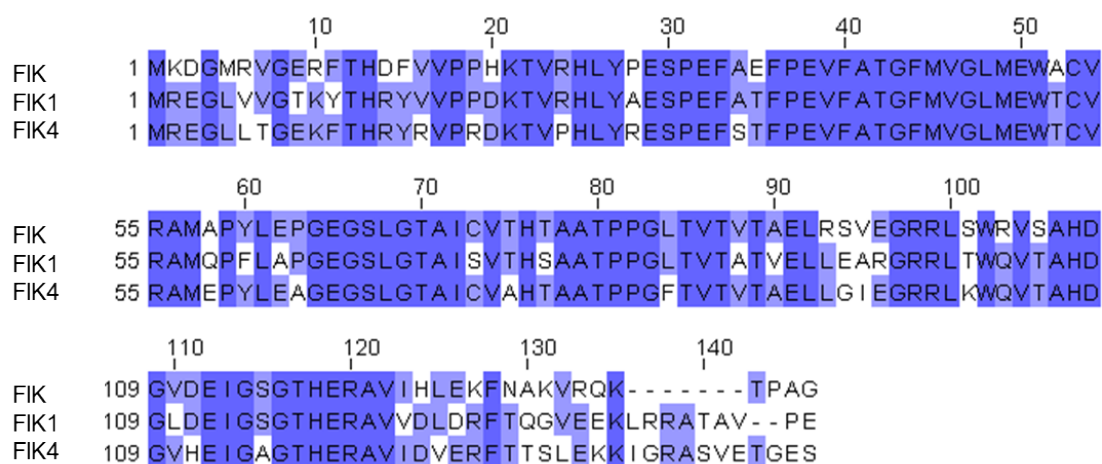

**Figure S3** Amino acid alignment among the fluoroacetyl-CoA thioesterase generated by Jalview. [REF] FIK is from *Streptomyces cattleya*; FIK1 is from *Streptomyces sp.* MA37; FIK4 is from *Streptomyces xinghaiensis* NRRL B24674;

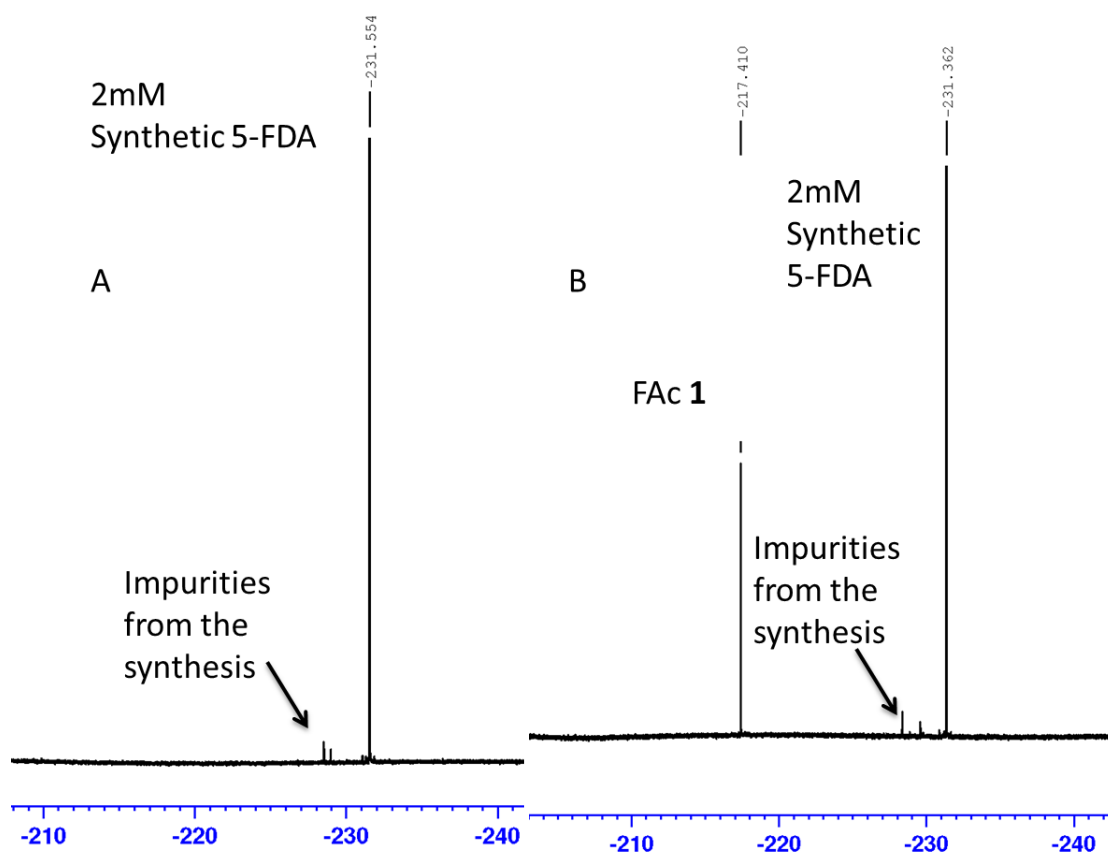

**Figure S4,**  $^{19}\text{F}$  NMR spectra: **A.** 2 mM synthetic 5'-fluoro-5'-deoxyadenosine (5'-FDA); **B.** the supernatant of *S. xinghaiensis* culture spiking with 2 mM 5'-FDA.

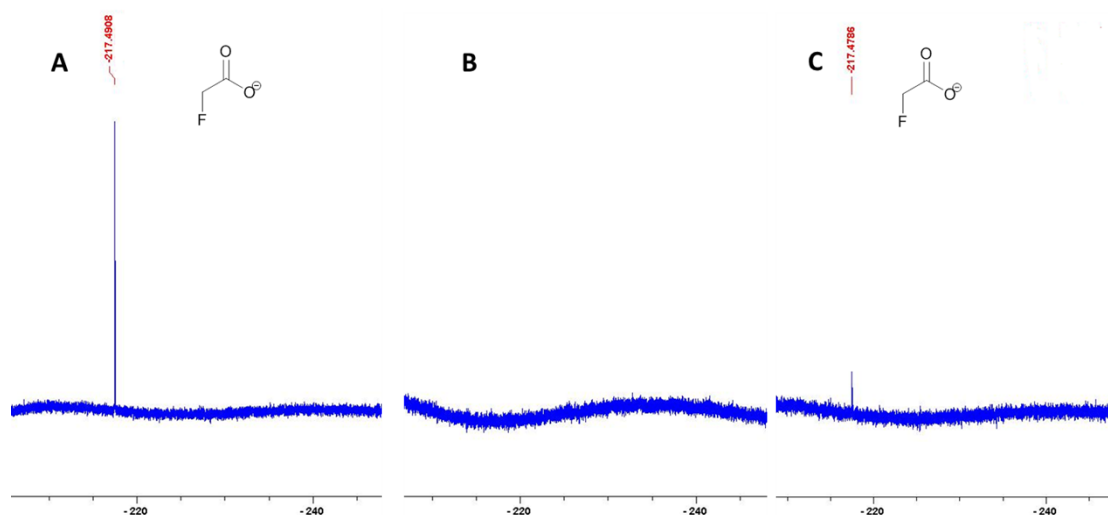

**Figure S4,**  $^{19}\text{F}$  NMR spectra of the culture supernatants from **A.** the wild type strain of *S. xinghaiensis*; **B.** the mutant WDY40 and **C.** the mutant WDY41.

| ORF   | Proposed functions                          | AA  | Identity(%) | Homologue in <i>S. cattleya</i> |
|-------|---------------------------------------------|-----|-------------|---------------------------------|
| FlK4  | Fluoroacetyl CoA thioesterase               | 147 | 73%         | FlK (SCATT_41470)               |
| Orf1  | Hypothetical protein                        | 64  |             |                                 |
| Orf2  | Hypothetical protein                        | 99  |             |                                 |
| OrfA4 | Carboxylate/Amino Acid/Amine<br>Transporter | 80  | 76%         | SCATT_p11750                    |
| OrfB4 | YbaK/prolyl-tRNA synthetase                 | 191 | 81%         | SCATT_p11770                    |
| FIB4  | 5'-FDA phosphorylase                        | 299 | 66%         | FIB (SCATT_41550)               |
| FIA4  | 5'-FDA synthase                             | 300 | 88%         | FIA (SCATT_41540)               |
| FIFT4 | 4-fluorothreonine transaldolase             | 625 | 72%         | FIFT(SCATT_p11780)              |
| FIF4  | DNA binding regulatory protein              | 119 | 72%         | FIF (SCATT_41530)               |
| FIG4  | DNA binding regulatory protein              | 226 | 61%         | FIG (SCATT_41520)               |
| FIH4  | Na <sup>+</sup> /H <sup>+</sup> antiporter  | 451 | 57%         | FIH (SCATT_41500)               |
| FII4  | adenosylhomocysteine hydrolase              | 487 | 82%         | FII (SCATT_41490)               |
| Orf5  | Adenine phosphoribosyltransferase           | 181 |             |                                 |
| Orf6  | Hypothetical protein                        | 116 |             |                                 |
| Orf7  | S-adenosine-L-methionine synthetase         | 398 |             |                                 |

**Table S2.** Deduced functions of ORFs in the putative fluorometabolite biosynthetic gene cluster in *Streptomyces xinghaiensis* NRRL B24674 compared with the homologs in *S. cattleya*.

#### References:

- 1 T. Kieser, *Practical streptomyces genetics*. 2000.
- 2 Y. Yu, L. Duan, Q. Zhang, R. Liao, Y. Ding, *et al. ACS Chem. Biol.*, 2009, **4**, 855.
- 3 A. Eustáquio, F. Pojer, J. P. Noel, B. S. Moore, *Nat. Chem. Biol.*, 2008, **4**, 69.
- 4 H. Deng, C. H. Botting, J. T.G. Hamilton, R. J. M. Russell, D. O'Hagan, *Angew. Chemie. Int. Ed.*, 2008, **47**, 5357 .
